# Supplementary material for: A Systematic Study of Motif Pairs That May Facilitate Enhancer-Promoter Interactions
Source: Research Square preprint supplement (doi:10.21203/rs.3.rs-678095/v1), 2021-08-30
Supplement: Supplementary file 1 [file 1b59bcd2cbcf7a321139ecf3.docx]

# **A systematic study of motif pairs may facilitate enhancer-promoter interactions**

**Saidi Wang1****, Haiyan Hu1*, Xiaoman Li2***

1Department of Computer Science, University of Central Florida, Orlando, FL, 32816, USA

2Burnett school of Biomedical Science, College of Medicine, University of Central Florida, Orlando, FL, 32816, USA

*to whom correspondence should be addressed.

Contact: [xiaoman@mail.ucf.edu](mailto:xiaoman@mail.ucf.edu), haihu@cs.ucf.edu

**S1 Table. Basic information about the data used in the paper.**

| **cell line** | **sequencing depth**  **(million)** | **#enhancers** | **#promoters** | **#enhancer length** | **#promoter length** | **#positive EP pairs** | **#3rd type negative EP pairs** |
| --- | --- | --- | --- | --- | --- | --- | --- |
| GM12878 | 15112.0 | 2731 | 2171 | 372 | 1100 | 3688 | 28458 |
| HMEC | 1068.0 | 1761 | 1713 | 370 | 1100 | 2157 | 10719 |
| HUVEC | 892.8 | 751 | 650 | 382 | 1100 | 835 | 4966 |
| IMR90 | 1683.1 | 2344 | 2137 | 381 | 1100 | 3226 | 8859 |
| K562 | 1366.2 | 2096 | 1942 | 367 | 1100 | 2972 | 9666 |
| KBM7 | 1247.9 | 6278 | 5970 | 320 | 1100 | 7862 | 56787 |
| NHEK | 1347.5 | 1160 | 1018 | 372 | 1100 | 1313 | 5022 |

**S2 Table. Comparison of the predicted TF interaction with known ones in BioGRID.**

| **cell line** | **#predicted TFs supported by BioGRID** | **#predicted direct TFs pairs supported by BioGRID** | **P-value of #predicted direct TF pairs supported by BioGRID** | **#predicted TF pairs supported by BioGRID** | **P-value of # TF pairs supported by BioGRID** |
| --- | --- | --- | --- | --- | --- |
| GM12878 | 299  (265) | 335  (208) | 5.7E-06  (4.4E-01) | 7252  (4868) | 6.4E-257  (1.5E-65) |
| HMEC | 213  (139) | 194  (56) | 2.4E-07  (5.0E-01) | 3902  (1430) | 6.1E-178  (4.7E-32) |
| HUVEC | 73  (44) | 55  (16) | 1.13E-15  (4.1E-05) | 912  (277) | 8.66E-228  (1.3E-53) |
| IMR90 | 262  (205) | 297  (113) | 7.0E-11  (8.2E-01) | 6303  (2753) | 0  (5.3E-23) |
| K562 | 285  (241) | 258  (164) | 1.0E-01  (6.9E-01) | 6207  (3733) | 1.2E-160  (8.1E-25) |
| KBM7 | 359  (307) | 557  (392) | 4.4E-19  (1.19E-11) | 10876  (8179) | 0  (0) |
| NHEK | 78  (57) | 56  (33) | 7.5E-14  (4.0E-10) | 1071  (536) | 1.2E-278  (4.5E-128) |

In each entry, the information in order is the result based on all TFs for each predicted motif with STAMP cutoff 1E-05, and the result based on the most similar TF for each predicted motif with STAMP cutoff 1E-05. The p-value in 4th and 6th column is calculated based on hypergeometric testing. There are 1520 TFs in BioGRID, which are supported by GO. And there are 6820 TF pairs in BioGRID based on the 1520 TFs

**S3 Table. Comparison between Zhang et al.’s study with BioGRID**

| **cell line** | **#predicted TFs supported by BioGRID** | **# predicted direct TFs pairs supported by BioGRID** | **P-value of # predicted direct TF pairs supported by BioGRID** | **#predicted TF pairs supported by BioGRID** | **P-value of # TF pairs supported by BioGRID** |
| --- | --- | --- | --- | --- | --- |
| GM12878 | 61 | 25 | 5.8E-05 | 155 | 1 |
| K562 | 22 | 4 | 1.3E-2 | 34 | 3.0E-2 |

**S4 Table. TF pairs for 72 selected motif pairs by LASSO**

| **motif pairs** | **known TF pairs** | **supported by BioGRID** | **supported by reference** | **supported(BioGRID or literature)** |
| --- | --- | --- | --- | --- |
| M2--M36 | ZBTB7A--ZNF274,SP1--ZNF274,SP2--ZNF274,EGR1--ZNF274 | N | [[29]](https://www.ncbi.nlm.nih.gov/pmc/articles/PMC4910881/) | literature |
| M0--M1 | EGR1--FOXM1,FOXK1--KLF6,FOXM1--SP1,FOXO1--SP2,FOXK1--SP3,FOXO1--SP3,FOXK1--SP2 | Y | [[29]](https://www.ncbi.nlm.nih.gov/pmc/articles/PMC4910881/) [[30]](https://pubmed.ncbi.nlm.nih.gov/33160328/) | Both |
| M1--M2 | E2F6--MAZ,EGR1--MAZ,E2F4--ZNF263,E2F6--ZNF263,E2F4--MAZ,SP1--ZNF263,E2F1--MAZ,MAZ--SP1,MAZ--ZBTB7A,MAZ--SP2,EGR1--ZNF263,ZBTB7A--ZNF263,SP2--ZNF263 | Y | [[12]](https://www.nature.com/articles/ncomms12249) [[28]](https://pubmed.ncbi.nlm.nih.gov/26411866/) [[29]](https://www.ncbi.nlm.nih.gov/pmc/articles/PMC4910881/) | Both |
| M1--M8 | NA | N | NA | NA |
| M1--M30 | EBF1--EGR1,EBF1--SP1,EBF1--PAX5 | Y | [[12]](https://www.nature.com/articles/ncomms12249) [[29]](https://www.ncbi.nlm.nih.gov/pmc/articles/PMC4910881/) | Both |
| M0--M37 | NA | N | NA | NA |
| M0--M13 | NA | Y | NA | BioGRID |
| M1--M1 | KLF15--SP4,SP1--SP2,E2F6--SP3,E2F6--SP2,E2F1--E2F6,SP2--TAL1,EGR1--SP1,E2F4--EGR1,E2F3--SP3,E2F3--KLF6,E2F4--ZBTB7A,E2F6--ZBTB7A,SP1--TAL1,KLF4--SP1,KLF15--SP2,E2F6--EGR1,KLF15--KLF6,E2F6--KLF6,EGR1--ZBTB7A,SP2--ZBTB7A,E2F1--E2F4,E2F6--SP1,KLF15--SP3,EGR1--TAL1,SP1--ZBTB7A,EGR1--SP2,E2F4--E2F6,TAL1--ZBTB7A,E2F4--SP2,E2F4--SP1,SP1--SP3 | Y | [[27]](https://www.pnas.org/content/114/25/E4914) [[28]](https://pubmed.ncbi.nlm.nih.gov/26411866/) [[29]](https://www.ncbi.nlm.nih.gov/pmc/articles/PMC4910881/) [[30]](https://pubmed.ncbi.nlm.nih.gov/33160328/) | Both |
| M30--M7 | EBF1--MAZ | N | [[29]](https://www.ncbi.nlm.nih.gov/pmc/articles/PMC4910881/) | literature |
| M13--M7 | EGR1--MAZ,SP1--ZNF263,MAZ--SP1,MAZ--ZBTB7A,MAZ--SP2,EGR1--ZNF263,ZBTB7A--ZNF263,SP2--ZNF263 | Y | [[12]](https://www.nature.com/articles/ncomms12249) [[28]](https://pubmed.ncbi.nlm.nih.gov/26411866/) [[29]](https://www.ncbi.nlm.nih.gov/pmc/articles/PMC4910881/) | Both |
| M1--M11 | NR2C2--SP1,ETS1--SP2,ETS1--ZBTB7A,GABPA--SP2,KLF15--SP4,EHF--SP3,E2F4--ELK1,SP1--SP2,E2F6--SP3,E2F1--ELK4,EGR1--SP1,EHF--SP2,ELF2--KLF15,ELK1--SP1,GABPA--SP3,E2F3--SP3,EGR1--ELF1,E2F4--ELK4,KLF4--SP1,E2F1--GABPA,E2F6--ELK1,ELK1--SP2,E2F6--NR2C2,E2F4--ELF1,E2F4--ETS1,E2F6--ELK4,NR2C2--SP2,E2F6--GABPA,ETS1--SP1,ELF1--ZBTB7A,GABPA--ZBTB7A,E2F6--ELF1,EBF1--EGR1,EGR1--GABPA,EGR1--NR2C2,GABPA--SP1,EGR1--ELK1,ELF1--SP1,ELF1--SP2,NR2C2--ZBTB7A,EBF1--SP1,E2F6--SP1,KLF15--SP3,E2F4--NR2C2,SP1--ZBTB7A,ELK1--ZBTB7A,E2F4--GABPA,E2F6--ETS1,EGR1--ETS1,E2F1--ELK1,E2F4--SP1,SP1--SP3,E2F1--NR2C2 | Y | [[12]](https://www.nature.com/articles/ncomms12249) [[27]](https://www.pnas.org/content/114/25/E4914) [[28]](https://pubmed.ncbi.nlm.nih.gov/26411866/) [[29]](https://www.ncbi.nlm.nih.gov/pmc/articles/PMC4910881/) [[30]](https://pubmed.ncbi.nlm.nih.gov/33160328/) | Both |
| M1--M14 | MAFK--SP2,ATF1--EGR1,ATF3--E2F6,MAFK--ZBTB7A,E2F1--SMARCC1,EGR1--NFE2,E2F1--JUN,JUNB--SP1,EGR1--FOS::JUN,BACH1--ZBTB7A,FOXK1--SP2,E2F6--JUNB,EGR1--JUND,E2F1--SMARCC2,FOS::JUN--SP2,MAFF--ZBTB7A,BATF--EGR1,FOS--SP1,E2F6--FOSL2,E2F6--FOSL1,JUND--SP1,CREB1--SP2,EGR1--FOSL2,BATF--E2F4,E2F6--FOS::JUN,EGR1--MAFK,ATF1--E2F4,EGR1--JUNB,NFE2--SP1,FOS::JUN--SP1,BATF--SP1,E2F6--MAFF,E2F4--FOS,FOS--ZBTB7A,EGR1--MAFF,EGR1--JUN,EGR1--FOS,E2F6--NFE2,E2F6--JUN,E2F6--MAFK,FOSL1--SP1,MAFK--SP1,NFE2--SP2,FOSL1--SP2,JUND--ZBTB7A,E2F4--NFE2,E2F6--SMARCC1,FOXK1--SP3,EGR1--FOSL1,ATF3--SP2,E2F4--JUN,JUN--SP2,JUN--SP1,BACH1--E2F6,FOXK1--KLF6,CREB1--E2F6,E2F6--FOS,BACH1--SP1,E2F4--MAFF,CREB1--SP1,E2F6--JUND,BACH1::MAFK--SP2,E2F4--FOSL2,JUNB--SP2,CREB1--ZBTB7A,E2F4--SMARCC1,FOS--SP2,BACH1--E2F4,ATF1--ZBTB7A,E2F4--JUND,MAFF--SP2,ATF1--SP1,FOSL1--ZBTB7A,E2F4--NFE2L2,BACH1--EGR1,BACH1::MAFK--EGR1,NFE2--ZBTB7A,JUN--ZBTB7A,ATF3--E2F4,CREB1--E2F4,ATF1--E2F6,CREB1--EGR1,ATF1--SP2,EGR1--NFE2L2,ATF3--SP1,E2F4--MAFK,BACH1::MAFK--E2F6,FOSL2--SP2,BACH1::MAFK--SP1,E2F1--MAFK,E2F1--JUND,E2F1--FOS,E2F4--SMARCC2,E2F4--JUNB,BACH1--SP2,ATF3--EGR1,BACH1::MAFK--E2F4,JUNB--ZBTB7A,E2F6--NFE2L2,FOSL2--SP1,E2F6--SMARCC2,E2F4--FOS::JUN,ATF3--ZBTB7A,MAFF--SP1,E2F4--FOSL1,JUND--SP2 | Y | [[12]](https://www.nature.com/articles/ncomms12249) [[28]](https://pubmed.ncbi.nlm.nih.gov/26411866/) [[29]](https://www.ncbi.nlm.nih.gov/pmc/articles/PMC4910881/) [[30]](https://pubmed.ncbi.nlm.nih.gov/33160328/) | Both |
| M1--M38 | FOXK1--KLF6,FOXK1--SP3,FOXK1--SP2 | Y | [[30]](https://pubmed.ncbi.nlm.nih.gov/33160328/) | Both |
| M1--M35 | SP2--ZBTB7A,SP1--ZBTB7A,EGR1--ZBTB7A | Y | [[29]](https://www.ncbi.nlm.nih.gov/pmc/articles/PMC4910881/) | Both |
| M1--M31 | ELF1--SP1,GABPA--SP3,ETS1--SP2,ELF1--SP2,ETS1--SP1,ELF1--ZBTB7A,GABPA--ZBTB7A,ETS1--ZBTB7A,GABPA--SP2,ELK1--SP1,EHF--SP3,EGR1--ELF1,ELK1--ZBTB7A,ELK1--SP2,EGR1--GABPA,EGR1--ETS1,EHF--SP2,GABPA--SP1,ELF2--KLF15,EGR1--ELK1 | Y | [[12]](https://www.nature.com/articles/ncomms12249) [[27]](https://www.pnas.org/content/114/25/E4914) [[28]](https://pubmed.ncbi.nlm.nih.gov/26411866/) [[29]](https://www.ncbi.nlm.nih.gov/pmc/articles/PMC4910881/) [[30]](https://pubmed.ncbi.nlm.nih.gov/33160328/) | Both |
| M1--M13 | E2F3--SP3,E2F3--KLF6,KLF15--SP3,KLF15--SP4,SP1--ZBTB7A,EGR1--SP2,SP1--SP2,KLF15--KLF6,KLF4--SP1,EGR1--ZBTB7A,KLF15--SP2,EGR1--SP1,SP1--SP3,SP2--ZBTB7A | Y | [[27]](https://www.pnas.org/content/114/25/E4914) [[28]](https://pubmed.ncbi.nlm.nih.gov/26411866/) [[29]](https://www.ncbi.nlm.nih.gov/pmc/articles/PMC4910881/) [[30]](https://pubmed.ncbi.nlm.nih.gov/33160328/) | Both |
| M2--M35 | SP2--ZBTB7A,SP1--ZBTB7A,EGR1--ZBTB7A | Y | [[29]](https://www.ncbi.nlm.nih.gov/pmc/articles/PMC4910881/) | Both |
| M0--M3 | NA | Y | NA | BioGRID |
| M2--M5 | EGR1--MAZ,SP1--ZNF263,MAZ--SP1,MAZ--ZBTB7A,MAZ--SP2,EGR1--ZNF263,ZBTB7A--ZNF263,SP2--ZNF263 | Y | [[12]](https://www.nature.com/articles/ncomms12249) [[28]](https://pubmed.ncbi.nlm.nih.gov/26411866/) [[29]](https://www.ncbi.nlm.nih.gov/pmc/articles/PMC4910881/) | Both |
| M1--M7 | E2F6--MAZ,EGR1--MAZ,E2F4--ZNF263,E2F6--ZNF263,E2F4--MAZ,SP1--ZNF263,E2F1--MAZ,MAZ--SP1,MAZ--ZBTB7A,MAZ--SP2,EGR1--ZNF263,ZBTB7A--ZNF263,SP2--ZNF263 | Y | [[12]](https://www.nature.com/articles/ncomms12249) [[28]](https://pubmed.ncbi.nlm.nih.gov/26411866/) [[29]](https://www.ncbi.nlm.nih.gov/pmc/articles/PMC4910881/)  . | Both |
| M1--M4 | ARID3A--ZBTB7A,ARID3A--EGR1,ARID3A--SP2,ARID3A--SP1 | Y | [[29]](https://www.ncbi.nlm.nih.gov/pmc/articles/PMC4910881/) | Both |
| M1--M5 | E2F6--MAZ,EGR1--MAZ,E2F4--ZNF263,E2F6--ZNF263,E2F4--MAZ,SP1--ZNF263,E2F1--MAZ,MAZ--SP1,MAZ--ZBTB7A,MAZ--SP2,EGR1--ZNF263,ZBTB7A--ZNF263,SP2--ZNF263 | Y | [[12]](https://www.nature.com/articles/ncomms12249) [[28]](https://pubmed.ncbi.nlm.nih.gov/26411866/) [[29]](https://www.ncbi.nlm.nih.gov/pmc/articles/PMC4910881/) | Both |
| M1--M3 | KLF4--SP1,E2F6--KLF6,E2F3--KLF6,KLF15--KLF6 | Y | [[27]](https://www.pnas.org/content/114/25/E4914) [[30]](https://pubmed.ncbi.nlm.nih.gov/33160328/) | Both |
| M4--M7 | ARID3A--MAZ,ARID3A--ZNF263 | N | [[29]](https://www.ncbi.nlm.nih.gov/pmc/articles/PMC4910881/) | literature |
| M5--M7 | MAZ--ZNF263 | N | [[29]](https://www.ncbi.nlm.nih.gov/pmc/articles/PMC4910881/) | literature |
| M1--M18 | FOXO1--TFAP2B | Y | [[30]](https://pubmed.ncbi.nlm.nih.gov/33160328/) | Both |
| M0--M40 | BCL11A--FOXM1,FOXM1--IRF4,FOXM1--SPI1 | Y | [[12]](https://www.nature.com/articles/ncomms12249) [[29]](https://www.ncbi.nlm.nih.gov/pmc/articles/PMC4910881/) | Both |
| M1--M41 | MZF1--SP3,FOXO1--SP2,FOXO1--SP3,MZF1--SP2 | Y | [[30]](https://pubmed.ncbi.nlm.nih.gov/33160328/) | Both |
| M19--M2 | IRF4--SP3,BCL11A--SP1,MAZ--SP1,MAZ--ZBTB7A,BCL11A--EGR1,IRF1--ZBTB7A,SP2--ZNF263,IRF1--SP1,EGR1--SPI1,IRF1--KLF15,MAZ--SP2,SPI1--ZBTB7A,IRF4--SP4,IRF4--SP1,IRF4--SP2,EGR1--IRF4,SP2--SPI1,EGR1--ZNF263,ZBTB7A--ZNF263,EGR1--MAZ,SP1--SPI1,SP1--ZNF263,EGR1--IRF1,IRF1--SP2 | Y | [[12]](https://www.nature.com/articles/ncomms12249) [[28]](https://pubmed.ncbi.nlm.nih.gov/26411866/) [[29]](https://www.ncbi.nlm.nih.gov/pmc/articles/PMC4910881/) [[30]](https://pubmed.ncbi.nlm.nih.gov/33160328/) | Both |
| M1--M19 | E2F4--IRF1,IRF4--SP3,BCL11A--SP1,MAZ--SP1,MAZ--ZBTB7A,E2F4--SPI1,IRF1--ZBTB7A,BCL11A--EGR1,E2F6--SPI1,SP2--ZNF263,IRF1--SP1,E2F4--IRF4,EGR1--SPI1,IRF1--KLF15,E2F6--ZNF263,E2F4--MAZ,MAZ--SP2,E2F6--MAZ,SPI1--ZBTB7A,E2F4--ZNF263,IRF4--SP4,IRF4--SP1,IRF4--SP2,EGR1--IRF4,SP2--SPI1,EGR1--ZNF263,ZBTB7A--ZNF263,EGR1--MAZ,SP1--SPI1,SP1--ZNF263,E2F6--IRF1,E2F1--MAZ,EGR1--IRF1,BCL11A--E2F4,IRF1--SP2 | Y | [[12]](https://www.nature.com/articles/ncomms12249) [[28]](https://pubmed.ncbi.nlm.nih.gov/26411866/) [[29]](https://www.ncbi.nlm.nih.gov/pmc/articles/PMC4910881/) [[30]](https://pubmed.ncbi.nlm.nih.gov/33160328/) | Both |
| M0--M21 | NA | Y | NA | BioGRID |
| M0--M22 | NA | Y | NA | BioGRID |
| M0--M42 | NA | Y | NA | BioGRID |
| M0--M50 | NA | Y | NA | BioGRID |
| M0--M10 | NA | Y | NA | BioGRID |
| M10--M23 | NA | Y | NA | BioGRID |
| M1--M10 | NA | N | NA | NA |
| M22--M47 | GATA2--ZNF274,GATA1--ZNF274 | N | [[29]](https://www.ncbi.nlm.nih.gov/pmc/articles/PMC4910881/) | literature |
| M10--M50 | SP1--ZNF263,MAZ--SP1,MAZ--SP2,EGR1--ZNF263,EGR1--MAZ,SP2--ZNF263 | Y | [[12]](https://www.nature.com/articles/ncomms12249) [[28]](https://pubmed.ncbi.nlm.nih.gov/26411866/) [[29]](https://www.ncbi.nlm.nih.gov/pmc/articles/PMC4910881/) | Both |
| M1--M50 | SP1--TAL1,EGR1--TAL1,SP1--TCF3,SP1--TCF12,EGR1--TCF12,SP2--TAL1,EGR1--TCF3 | Y | [[12]](https://www.nature.com/articles/ncomms12249) [[29]](https://www.ncbi.nlm.nih.gov/pmc/articles/PMC4910881/) | Both |
| M3--M50 | EGR1--FOXM1,FOXM1--SP1,FOXO1--SP2,KLF4--SP1,FOXK1--SP3,FOXO1--SP3,FOXK1--SP2 | Y | [[27]](https://www.pnas.org/content/114/25/E4914) [[29]](https://www.ncbi.nlm.nih.gov/pmc/articles/PMC4910881/) [[30]](https://pubmed.ncbi.nlm.nih.gov/33160328/) | Both |
| M0--M18 | NA | Y | NA | BioGRID |
| M25--M26 | TFAP2A--ZNF143,SMARCC2--TFAP2A,ELK1--TFAP2C,SMARCC2--TFAP2C,ELK4--TFAP2C,GABPA--TFAP2C,TFAP2C--ZNF143,GABPA--TFAP2A,ELK1--TFAP2A,EBF1--GABPA,EBF1--ETS1,SMARCC1--TFAP2A,EBF1--SIX5,SMARCC1--TFAP2C,EBF1--IKZF1,EBF1--ZNF143,ELK4--TFAP2A,EBF1--ELK1 | Y | [[12]](https://www.nature.com/articles/ncomms12249) [[29]](https://www.ncbi.nlm.nih.gov/pmc/articles/PMC4910881/) | Both |
| M1--M25 | ETS1--SP2,ETS1--ZBTB7A,GABPA--SP2,EGR1--SIX5,ELK1--SP1,EGR1--ZNF143,GABPA--SP3,SIX5--SP1,SIX5--ZBTB7A,ELK1--SP2,SP1--ZNF143,SP2--ZNF143,ETS1--SP1,GABPA--ZBTB7A,IKZF1--SP1,EGR1--GABPA,ZBTB7A--ZNF143,GABPA--SP1,EGR1--ELK1,SIX5--SP2,EGR1--IKZF1,ELK1--ZBTB7A,EGR1--ETS1 | Y | [[12]](https://www.nature.com/articles/ncomms12249) [[27]](https://www.pnas.org/content/114/25/E4914) [[28]](https://pubmed.ncbi.nlm.nih.gov/26411866/) [[29]](https://www.ncbi.nlm.nih.gov/pmc/articles/PMC4910881/) | Both |
| M1--M54 | SP1--TAL1,EGR1--TAL1,CTCF--TAL1,CTCFL--TAL1,TAL1--ZBTB7A,SP2--TAL1 | Y | [[29]](https://www.ncbi.nlm.nih.gov/pmc/articles/PMC4910881/) | Both |
| M0--M53 | NA | Y | NA | BioGRID |
| M18--M53 | NA | Y | NA | BioGRID |
| M15--M18 | NA | Y | NA | BioGRID |
| M1--M26 | NA | Y | NA | BioGRID |
| M1--M15 | E2F3--SP3,KLF15--SP3,KLF15--SP4,SP1--ZBTB7A,EGR1--SP2,SP1--SP2,KLF4--SP1,KLF15--SP2,EGR1--SP1,SP1--SP3,SP2--ZBTB7A | Y | [[12]](https://www.nature.com/articles/ncomms12249) [[27]](https://www.pnas.org/content/114/25/E4914) [[28]](https://pubmed.ncbi.nlm.nih.gov/26411866/) [[29]](https://www.ncbi.nlm.nih.gov/pmc/articles/PMC4910881/) | Both |
| M19--M26 | EBF1--RELA | Y | [[12]](https://www.nature.com/articles/ncomms12249) | Both |
| M1--M22 | MZF1--SP3,FOXO1--SP2,FOXO1--SP3,MZF1--SP2 | Y | [[30]](https://pubmed.ncbi.nlm.nih.gov/33160328/) | Both |
| M19--M54 | CTCF--RELA | Y | [[29]](https://www.ncbi.nlm.nih.gov/pmc/articles/PMC4910881/) | Both |
| M1--M21 | EGR1--TCF12,SP1--TCF3,SP1--TCF12,MAZ--TCF3,MAZ--TCF12,EGR1--TCF3 | Y | [[12]](https://www.nature.com/articles/ncomms12249) [[29]](https://www.ncbi.nlm.nih.gov/pmc/articles/PMC4910881/) | Both |
| M18--M25 | TFAP2A--ZNF143,ELK1--TFAP2C,SMARCC2--TFAP2C,ELK4--TFAP2C,GABPA--TFAP2C,TFAP2C--ZNF143,GABPA--TFAP2A,ELK1--TFAP2A,SMARCC1--TFAP2A,SMARCC2--TFAP2A,SMARCC1--TFAP2C,ELK4--TFAP2A | Y | [[29]](https://www.ncbi.nlm.nih.gov/pmc/articles/PMC4910881/) | Both |
| M0--M14 | NA | Y | NA | BioGRID |
| M13--M58 | MZF1--SP3,FOXO1--SP2,FOXO1--SP3,MZF1--SP2 | Y | [[30]](https://pubmed.ncbi.nlm.nih.gov/33160328/) | Both |
| M0--M27 | NA | Y | NA | BioGRID |
| M0--M8 | NA | Y | NA | BioGRID |
| M0--M62 | NA | Y | NA | BioGRID |
| M0--M64 | NA | Y | NA | BioGRID |
| M0--M61 | NA | Y | NA | BioGRID |
| M0--M59 | NA | Y | NA | BioGRID |
| M0--M11 | NA | Y | NA | BioGRID |
| M3--M8 | NA | Y | NA | BioGRID |
| M26--M8 | EBF1--PAX5,IKZF1--PAX5 | Y | [[12]](https://www.nature.com/articles/ncomms12249) [[29]](https://www.ncbi.nlm.nih.gov/pmc/articles/PMC4910881/) | Both |
| M61--M8 | NA | Y | NA | BioGRID |
| M59--M61 | GATA1--ZBTB7A,GATA2--ZBTB7A | Y | [[29]](https://www.ncbi.nlm.nih.gov/pmc/articles/PMC4910881/) | Both |
| M13--M59 | GATA1--SP1,GATA2--SP1,EGR1--GATA2,GATA2--ZBTB7A,GATA1--ZBTB7A,GATA2--SP2,GATA1--SP2,EGR1--GATA1 | Y | [[29]](https://www.ncbi.nlm.nih.gov/pmc/articles/PMC4910881/) | Both |
| M21--M8 | EGR1--PAX5,MAZ--PAX5,PAX5--SP1 | Y | [[12]](https://www.nature.com/articles/ncomms12249) [[29]](https://www.ncbi.nlm.nih.gov/pmc/articles/PMC4910881/) | Both |
| M1--M69 | EGR1--FOXM1,FOXK1--KLF6,EGR1--POU2F2,POU2F2--SP1,FOXM1--SP1,FOXO1--SP2,FOXK1--SP3,FOXO1--SP3,FOXK1--SP2 | Y | [[12]](https://www.nature.com/articles/ncomms12249) [[29]](https://www.ncbi.nlm.nih.gov/pmc/articles/PMC4910881/) [[30]](https://pubmed.ncbi.nlm.nih.gov/33160328/) | Both |
| M1--M55 | NA | Y | NA | BioGRID |

**S5 Table. Predicted motif pairs from known motifs.**

| **cell line** | **#enhancers** | **#promoters** | **# EP pairs** | **#predicted motifs (%shared)** | **#predicted motif modules** | **#predicted motif pairs** |
| --- | --- | --- | --- | --- | --- | --- |
| GM12878 | 2371 | 2171 | 3688 | 50  (96.0%) | 10425 | 444  (95.3%, 12.2%, 2.1E-14, 89.4%) |
| HMEC | 1761 | 1713 | 2157 | 31  (100.0%) | 736 | 98  (100.0%, 14.3%, 3.6E-15, 86.7%) |
| HUVEC | 751 | 650 | 835 | 10  (100.0%) | 41 | 13  (100.0%, 30.8%, 2.2E-07, 46.2%) |
| IMR90 | 2344 | 2137 | 3226 | 48  (97.9%) | 9770 | 477  (86.6%, 10.5%, 3.2E-15, 89.5%) |
| K562 | 2096 | 1942 | 2972 | 48  (97.9%) | 7480 | 376  (91.8%, 10.9%, 0, 88.0%) |
| KBM7 | 6278 | 5970 | 7862 | 74  (76.6%) | 28701 | 989  (48.6%, 13.7%, 4.8E-14, 94.0%) |
| NHEK | 1160 | 1018 | 1313 | 12  (100%) | 118 | 24  (100.0%, 16.7%, 1.4E-15, 79.2%) |

The percentage in the “#predicted motifs” column is the percent of motifs in a cell line identified in other cell lines. The four numbers in the last column are the number of the predicted motif pairs, the percent of the predicted motif pairs in a cell line identified in other cell lines, the percentage of random motif pairs in a cell line identified in other cell lines, and the p-value of the number of the predicted motif pairs in a cell line identified in other cell lines, and the percentage of motif pairs found in the de novo predicted motif pairs independent of known motifs in the paper, respectively.

**S6 Table.** **Almost all motifs (SIOMICS) are likely to occur in both enhancers and promoters.**

| **cell line** | **# predicted motifs** | **with length** | | | **without length** | | |
| --- | --- | --- | --- | --- | --- | --- | --- |
| **%Enhancer motif** | **%Promoter motif** | **%Enhancer and Promoter motif** | **%Enhancer motif** | **%Promoter motif** | **%Enhancer and Promoter motif** |
| GM12878 | 241 | 51.5% | 2.1% | 46.4% | 0.4% | 99.2% | 0.4% |
| HMEC | 83 | 45.8% | 0% | 54.2% | 2.4% | 96.4% | 1.2% |
| HUVEC | 14 | 14.3% | 7.1% | 78.6% | 0.0% | 100.0% | 0.0% |
| IMR90 | 190 | 61.1% | 1.5% | 37.4% | 0.0% | 99.5% | 0.5% |
| K562 | 180 | 49.4% | 2.2% | 48.3% | 0.5% | 98.9% | 0.6% |
| KBM7 | 428 | 57.0% | 1.2% | 41.82% | 0.7% | 98.8% | 0.5% |
| NHEK | 29 | 31.0% | 13.8% | 55.2% | 0.0% | 100.0% | 0.0% |
